# Supplementary material for: MRI Abdominal Fat Segmentation with a Novel VAT/SAT Delineation Algorithm: Otsu Regression Calibration and Comparison to K-Means &amp; Fuzzy C-Means
Source: Research Square preprint supplement (doi:10.21203/rs.3.rs-7239358/v1), 2025-09-01
Supplement: Supplementary file 1 [file c69112a5529606e14def85db.docx]

**Efficiency Analysis of MRI-based Segmentation: A Novel Algorithm for Discriminating Visceral and Somatic Abdominal Adipose Tissues for Otsu, K-means, and Fuzzy C-means Methods – Supplementary Information**

**Mihai Octavian** **Negrea1**, **Bogdan Neamtu1,2,3,4***, **Denisa Claudia Roman4**, **Ciprian Șofariu2**, **Raluca Maria Costea2**, **Darius Petelează4**

1 Faculty of Medicine, Lucian Blaga University, Sibiu, Romania; [dr.mihai.negrea@gmail.com](mailto:dr.mihai.negrea@gmail.com); [bogdan.neamtu@ulbsibiu.ro](mailto:bogdan.neamtu@ulbsibiu.ro);

2 Pediatric Research Department, Pediatric Clinical Hospital Sibiu, Sibiu [bogdan.neamtu@ulbsibiu.ro](mailto:bogdan.neamtu@ulbsibiu.ro), [ciprianradusofariu@gmail.com](mailto:ciprianradusofariu@gmail.com); [ralucacosteadr@gmail.com](mailto:ralucacosteadr@gmail.com);

3 Whiting School of Engineering, Johns Hopkins University, [bneamtu1@jh.edu](mailto:bneamtu1@jh.edu);

4 Computer Science and Electrical Engineering Department, Lucian Blaga University Sibiu, Romania ; [peteleaza.darius@gmail.com](mailto:peteleaza.darius@gmail.com); [claudia.roman@ulbsibiu.ro](mailto:claudia.roman@ulbsibiu.ro);

* Corresponding author: Bogdan Neamtu, [bneamtu1@jh.edu](mailto:bneamtu1@jh.edu)

**Overview of segmentation methods**

**Image pre-processing**

MRI images are innately grayscale representations of the signal intensities of imaged tissues [1]. Several mathematical morphological operations extensively studied in binary images can be applied to grayscale images to enhance certain structures and reduce noise [2]. The concept behind binary morphological operations uses a structuring element that is shifted across the image, transforming it according to how the element matches the underlying data. Erosion, dilation, opening, closing, and finally, top- and bottom-hat transforms are fundamental operations in this regard. Erosion reduces the size of objects and eliminates fine features, while dilation expands structures whenever one of the pixels at the edge of the foreground falls within the structural element defined. For grayscale images, the maximum or minimum gray value of the pixels found within each instance of the structural element is used to perform the operation. Opening and closing are operations that are composed of dilation and erosion in succession. Opening first erodes and then dilates the image with the same structuring element, while closing implies a reversed order of these operations. Opening can aid in noise removal, while closing can be useful for filling small holes. Finally, top-hat and bottom-hat transforms use opening and closing to enhance images. The Top-Hat transform accentuates small, bright regions within an image that stand out against a darker background by computing the difference between the input image and its opening. In comparison, the Bottom-Hat transform emphasizes dark areas that are distinct amidst a brighter background by computing the difference between the closing of the image and its original state [2,3].

Among further manipulation methods which can reduce noise, the Wiener filter stands out as a prominent technique in signal processing, offering a means to restore signals corrupted by additive noise. By leveraging statistical estimation and spectral analysis, the Wiener filter optimally attenuates noise while preserving the essential characteristics of the original signal. At the core of the Wiener filter lies a statistical model that characterizes the corrupted signal and noise. By assuming stationarity and Gaussian statistics, the filter estimates the power spectral densities of the signal and noise components and leverages this information to construct a frequency-dependent filter that adaptively suppresses noise while preserving the desired signal components [4,5]. Wiener filtering has been previously used and validated in studies using slices obtained through magnetic resonance imaging where discrimination of fat tissue was necessary [6].

These brief descriptions cover the functioning concepts behind the techniques used, while more detailed information can be found in the cited literature.

**Thresholding**

Adipose tissue identification can be approached by grayscale analysis of single slices and assigning a threshold grey level value for adipose tissue [7]. A histogram of the grey-level intensities can be used to identify the characteristic peak for adipose tissue based on the image acquisition protocol implemented [8]. Inhomogeneities in the magnetic field must be corrected to provide optimal results [8]. In this respect, initial manual selection of a region of interest known to contain only adipose tissue can expand the interval of grey-level values identified as adipose tissue in later segmentation [9]. Alternatively, the interval can be calculated based on statistical methods, where a Gaussian curve is defined with a mean value equal to the representative fat grey-level value identified, and the curve's height is given by the number of pixels corresponding to the grey level. Determining the standard deviation of the obtained curve can aid in establishing a threshold that accounts for possible inhomogeneities of the magnetic field [10]. A commonly used method for automatic threshold identification has been proposed by Otsu in 1979 [11] and has been successfully implemented in MRI-based abdominal adipose tissue segmentation [12]. The original principle of the method aims to distinguish an image from its background. The purpose is to effectively separate two classes of pixels from the original image by setting a threshold gray-level value discerning between foreground and background pixels. It assumes a bimodal distribution of grey levels, i.e., two distinct peaks in the histogram, which require separation – one for the background and one for the image of interest (in our case – adipose tissue). The algorithm is based on maximizing inter-class variance to find the appropriate threshold between the two classes mentioned above. Although the method has its limitations, its ease of use and efficiency have kept it in use while searching for ways to improve its performance [13]. For the precise workflow implemented in the Otsu method as well as the various improvements attempted, please refer to the cited literature [11,13]. Manual adjustment of the thresholds can also be implemented after the obtained initial results [8,9].

**Fuzzy C-means clustering**

An alternative approach is represented by the fuzzy clustering or fuzzy c-means algorithm [14–16]. This approach is based on the fact that there are generally 3 peaks in the gray value histograms of T1-weighted images – one corresponding to the background, one corresponding to lean mass, and one corresponding to adipose tissue. Consequently, three clusters can be identified based on the maximal points of each peak. Due to the clusters overlapping, a function of probability having possible values ranging from 0 to 1 can be defined for each individual pixel and cluster, which essentially returns the chance of a given pixel being classified as belonging to one of the clusters. The final results are usually used to create so-called "hard" membership masks by assigning each image element completely to the class in which it has the highest membership. The formulations on which the method is based are described in depth in the cited literature [15].

**K-means clustering**

While Fuzzy C-means clustering allows data points to have partial membership to multiple clusters, K-means clustering assigns data points strictly to a single cluster from a prespecified number of clusters. It is a centroid clustering algorithm designed to reduce the distances within each cluster as much as possible while maximizing the distances between distinct clusters, each defined by its centroid. Essentially, the K-means algorithm iteratively assigns data points to the nearest cluster centroid based on their distance. The cluster centroids are updated by calculating the mean of the data points assigned to each cluster. This process continues until convergence, where the cluster assignments no longer change significantly [17].

**Table S1. Softwares used in MRI-based abdominal adipose tissue quantification studies**

| **Reference** | **Software** |
| --- | --- |
| [18] | ImageJ |
| [9] | OsiriX, AdipoQuant |
| [7,19–23] | Slice-O-matic |
| [7,19–21] | Tomovision |
| [23] | NIHImage, Analyze, HippoFat, EasyVision |
| [14,24–28] | MATLAB |
| [29] | pMRI |
| [7,10,14,25,26,30] | In-house softwares |

**Table S2. Slice positions used in MRI-based single-slice abdominal adipose tissue quantification studies**

| **Reference** | **Slice localization** |
| --- | --- |
| [18,25] | L3-l4 |
| [19,20,30,31] | L4-L5 |
| [9,26] | Umbilicus |
| [26] | Head of humerus |
| [26] | Head of femur |

**Table S3. MRI parameters used in various studies**

| **Ref.** | **Pulse sequence** | **TR (ms)** | **TE (ms)** | **FOV (cm)** | **Matrix size** | **Slice**  **Thickness (mm)** | **Slice interval (mm)** |
| --- | --- | --- | --- | --- | --- | --- | --- |
| [19.20] | Spin-echo T1 | 210 | 17 | 48 | 256x256 | 10 | 40 |
| [21] | Spin-echo T1 | 300 | 11 | 48 | 256x256 | 10 | 40 |
| [7] | Spin-echo T1 | 600 | 16 | 24 | 256x256 | 5 | 5 |
| [32] | Spin-echo T1 | 210 | 17 | 48x36 | 256x256 | 10 | 50 |
| [18] | Fast-spin-echo T1 | 230 | 4.4 | 44 | 512x512 | 5 | 1 |
| [9] | T1 | 280 | 4.76 | Var. | 256x256 | 4 | Single slice |
| [9] | T2 | 4000 | 199 | Var. | 256x256 | 4 | Single slice |
| [22] | Spin-echo T1 | 400 | 7.8 | - | - | 6.5 | - |
| [10] | Fast-gradient-echo T1 | 120 | 4.2 | - | - | - | - |
| [29] | Turbo-spin-echo T2 | - | - | - | - | - | - |
| [30] | Gradient-echo T1 | 76 | 2.3 and 4.6 | 5.3x5.3 | 480x480 reconstruction | 10 | 0.5 |
| [14] | Double-echo  Gradient-echo T1 | 112 | 2.4 and 4.8 | 5.3x5.3 | 216x177 acquisition  512x512  reconstruction | 8 | 2 |
| [26] | Fast-spin-echo T1 | 490 | 12 | 4.5 to 5.3 | 256x178 | 10 | 10 |
| [27] | Fast-spin-echo T1 | 490 | 11 | 4.8 to 5.6 | 256x178.5 | 10 | 10 |
| [15] | Fast-spin-echo T1 | 490 | 12 | 4.5 to 5.3 | 256x178 | 10 | 10 |

**Table S4. Reasons for patient exclusion**

| **Reason** | **Description/Example** | **Count** |
| --- | --- | --- |
| Extensive abdominal surgery | colectomy, hemihepatectomy | 4 |
| Massive intra-abdominal pathology | giant pancreatic pseudocyst, massive tumor | 4 |
| Multiple examinations of the same patient |  | 10 |
| Missing in/opposed phase protocol |  | 24 |
| Missing data | informed consent, BMI, adequate L2-section | 34 |
| Inappropriate age | under 6 years | 14 |
| Unsatisfactory image quality | breathing artefacts, inadequate FOV | 15 |
| **TOTAL** |  | 105 |

**S1 Figure 1 - Count of MRI Diagnoses**

**Table S5. Performance (Dice coefficient – mean ± standard deviation) of all three algorithms across patient groups**

| **GENDER** | |  | | **Female** | | **Male** | | **p-value** | |
| --- | --- | --- | --- | --- | --- | --- | --- | --- | --- |
| **Otsu** | | **TAT** | | 0.9079±0.036 | | 0.9243±0.0274 | | 0.045 | |
| **SAT** | | 0.9644±0.0136 | | 0.9652±0.0168 | | 0.630 | |
| **VAT** | | 0.759±0.1121 | | 0.8209±0.0904 | | 0.019 | |
| **K-means** | | **TAT** | | 0.9012±0.0407 | | 0.9210±0.0280 | | 0.032 | |
| **SAT** | | 0.9643±0.0136 | | 0.9651±0.0169 | | 0.639 | |
| **VAT** | | 0.7584±0.1120 | | 0.8202±0.0907 | | 0.019 | |
| **Fuzzy C-means** | | **TAT** | | 0.9±0.0403 | | 0.9187±0.0292 | | 0.034 | |
| **SAT** | | 0.9634±0.0139 | | 0.9641±0.0171 | | 0.697 | |
| **VAT** | | 0.754±0.1116 | | 0.8145±0.0923 | | 0.013 | |
| **AGE GROUP** | |  | | **Child** | | **Adult** | | **p-value** | |
| **Otsu** | | **TAT** | | 0.9293±0.0289 | | 0.9088±0.0334 | | 0.012 | |
| **SAT** | | 0.9731±0.0119 | | 0.961±0.0148 | | < 0.01 | |
| **VAT** | | 0.7483±0.0942 | | 0.8032±0.1089 | | 0.017 | |
| **K-means** | | **TAT** | | 0.9220±0.0374 | | 0.9045±0.0356 | | 0.025 | |
| **SAT** | | 0.9730±0.012 | | 0.9609±0.0148 | | < 0.01 | |
| **VAT** | | 0.7477±0.0943 | | 0.8026±0.1088 | | 0.017 | |
| **Fuzzy C-means** | | **TAT** | | 0.9209±0.0370 | | 0.9026±0.0356 | | 0.022 | |
| **SAT** | | 0.9723±0.0123 | | 0.9599±0.015 | | 0.02 | |
| **VAT** | | 0.7425±0.0945 | | 0.7977±0.109 | | 0.017 | |
| **WEIGHT CATEGORY** |  | | **Normal weight** | | **Overweight** | | **Obese** | | **p-value** |
| **Otsu** | **TAT** | | 0.8962±0.0331 | | 0.9061±0.0294 | | 0.937±0.0226 | | <0.01 |
| **SAT** | | 0.9599±0.0140 | | 0.9588±0.0144 | | 0.9728±0.0128 | | <0.01 |
| **VAT** | | 0.7358±0.1123 | | 0.8041±0.097 | | 0.8149±0.0976 | | 0.035 |
| **K-means** | **TAT** | | 0.8856±0.038 | | 0.9029±0.03 | | 0.9347±0.0229 | | <0.01 |
| **SAT** | | 0.9599±0.014 | | 0.9587±0.0145 | | 0.9727±0.0128 | | <0.01 |
| **VAT** | | 0.7352±0.1123 | | 0.8036±0.0968 | | 0.8141±0.0979 | | 0.037 |
| **Fuzzy C-means** | **TAT** | | 0.8847±0.0376 | | 0.9004±0.0308 | | 0.9329±0.0233 | | <0.01 |
| **SAT** | | 0.9591±0.0141 | | 0.9575±0.0146 | | 0.9719±0.0132 | | <0.01 |
| **VAT** | | 0.7314±0.1115 | | 0.7981±0.0972 | | 0.8086±0.0996 | | 0.043 |
| **DIAGNOSIS TYPE** |  | | **Normal MRI** | | **Benign** | | **Malignant** | | **p-value** |
| **Otsu** | **TAT** | | 0.9314±0.0253 | | 0.9088±0.0358 | | 0.9149±0.0238 | | 0.062 |
| **SAT** | | 0.9692±0.0137 | | 0.9647±0.0149 | | 0.9552±0.0155 | | 0.091 |
| **VAT** | | 0.8016±0.1143 | | 0.7704±0.1075 | | 0.8390±0.0712 | | 0.173 |
| **K-means** | **TAT** | | 0.9269±0.0274 | | 0.9027±0.04 | | .9127±0.0243 | | 0.077 |
| **SAT** | | 0.9691±0.0137 | | 0.9646±0.0149 | | 0.9551±0.0156 | | 0.090 |
| **VAT** | | 0.8013±0.1143 | | 0.7696±0.1073 | | 0.8387±0.0715 | | 0.160 |
| **Fuzzy C-means** | **TAT** | | 0.9252±0.0273 | | 0.9011±0.04 | | 0.9104±0.025 | | 0.092 |
| **SAT** | | 0.9683±0.0136 | | 0.9637±0.0152 | | 0.9541±0.0158 | | 0.095 |
| **VAT** | | 0.7692±0.1146 | | 0.7646±0.1074 | | 0.8343±0.0727 | | 0.166 |

**Table S6. Cluster analysis targeting VAT segmentation performance**

| Variable | Characteristic | Cluster 1 | Cluster 2 | Cluster 3 | Cluster 4 | Cluster 5 | p-value |
| --- | --- | --- | --- | --- | --- | --- | --- |
| **Count** | - | 7 (10.3%) | 13 (19.1%) | 14 (20.6%) | 19 (27.9%) | 15 (22.1%) | - |
| **VAT Dice (Otsu)** | Mean | 0.7028 | 0.7096 | 0.7710 | 0.8105 | 0.8752 | <0.01 |
| StdDev | 0.0852 | 0.0993 | 0.0929 | 0.1060 | 0.0477 |
| Predictor importance | 0.34 | | | | | |
| **Age category** | Children | 7  (100%) | 0  (0%) | 14  (100%) | 0  (0%) | 0  (0%) | <0.01 |
| Adults | 0  (0%) | 13  (100%) | 0  (0%) | 19  (100%) | 15  (100%) |
| Predictor importance | 1 | | | | | |
| **Gender** | Female | 6  (85.7%) | 13  (100%) | 0  (0%) | 19  (100%) | 0  (0%) | <0.01 |
| Male | 1  (14.3%) | 0  (0%) | 14  (100%) | 0  (0%) | 15  (100%) |
| Predictor importance | 0.94 | | | | | |
| **Weight status** | Normal weight | 5  (71.4%) | 13  (100%) | 0  (0%) | 0  (0%) | 4  (26.7%) | <0.01 |
| Overweight or obese | 2  (28.6%) | 0  (0%) | 14  (100%) | 19  (100%) | 11  (73.3%) |
| Predictor importance | 0.68 | | | | | |

**Table S7. Regression model for VAT Dice coefficient using Otsu threshold method**

| **Variable** | **Parameter** | **Values** |
| --- | --- | --- |
| **Constant** | B | 0.647 |
| BCa 95%CI | 0.592-0.697 |
| p-value | <0.01 |
| **Gender** | B | 0.076 |
| BCa 95%CI | 0.027-0.121 |
| p-value | <0.01 |
| **Age category** | B | 0.093 |
| BCa 95%CI | 0.047-0.138 |
| p-value | <0.01 |
| **Weight status**  **Dichotomized** | B | 0.062 |
| BCa 95%CI | 0.012-0.117 |
| p-value | 0.02 |

**Table S8. Regression model for VAT surface accuracy improvement**

| **Variable** | **Parameter** | **Values** |
| --- | --- | --- |
| **Constant** | B | 7.224 |
| BCa 95%CI | 3.5-11.6 |
| p-value | <0.01 |
| **VAT surface (Otsu Threshold)** | B | 1.112 |
| BCa 95%CI | 1.063-1.157 |
| p-value | <0.01 |
| **Obesity** | B | 7.583 |
| BCa 95%CI | 1.978-13.035 |
| p-value | 0.014 |

**Figure S2. Correlation between estimated and manually determined VAT surface**

**Figure S3 – Bland-Altman plot for estimated VAT surface**

**Table S9. Regression model for SAT surface accuracy improvement**

| **Variable** | **Parameter** | **Values** |
| --- | --- | --- |
| **Constant** | B | 0.67 |
| BCa 95%CI | -2.116-3.179 |
| p-value | 0.622 |
| **SAT surface (Otsu Threshold)** | B | 1.037 |
| BCa 95%CI | 1.020-1.056 |
| p-value | <0.01 |
| **Age Category** | B | 3.337 |
| BCa 95%CI | 1.134-5.674 |
| p-value | <0.01 |

**Figure S4. Correlation between estimated and manually determined SAT surface**

**Figure S5. Bland-Altman plot for estimated SAT surface**

**Table S10. Adipose tissue proportions across patient groups**

| **Parameter** | **Values** | **VAT/TAT %** | **p-val.** | **VAT/SAT ratio** | **p-val.** |
| --- | --- | --- | --- | --- | --- |
| **Gender** | Female | 34.03±12.06 | 0.122 | 0.57±0.33 | 0.208 |
| Male | 40.01±17.87 | 0.85±0.64 |
| **Age category** | Children | 24.72±8.62 | <0.01 | 0.35±0.17 | <0.01 |
| Adults | 42±14.31 | 0.85±0.53 |
| **Weight status** | Normal | 36.99±13.79 | 0.026 | 0.68±0.45 | 0.042 |
| Overweight | 43.59±16.51 | 0.95±0.65 |
| Obese | 31.52±13.46 | 0.53±0.36 |
| **Diagnosis type** | Normal | 33.48±13.8 | 0.210 | 0.58±0.39 | 0.302 |
| Benign | 36.4±15.18 | 0.69±0.52 |
| Malignant | 44.88±16.02 | 0.96±0.6 |

**Table S11. Adipose tissue surfaces across patient groups in adults**

| **Parameter** | **Values** | **VAT**  **(cm2)** | **p-val.** | **SAT (cm2)** | **p-val.** | **TAT**  **(cm2)** | **p-val.** |
| --- | --- | --- | --- | --- | --- | --- | --- |
| **Gender** | Female | 102.1±75.9 | <0.01 | 171±89.1 | 0.465 | 273.1±148.2 | 0.115 |
| Male | 177.8±59 | 142.6±49.9 | 320.4±84 |
| **Weight status** | Normal | 74±52.9 | <0.01 | 103.5±43.7 | <0.01 | 177.5±83.2 | <0.01 |
| Overweight | 137.9±75 | 147.5±47.8 | 285.4±86.2 |
| Obese | 179.5±73.7 | 257.1±59.9 | 436±80.7 |
| **Diagnosis type** | Normal | 144.2±43.4 | 0.176 | 214.6±80.4 | 0.049 | 358.8±86.1 | 0.03 |
| Benign | 113.5±85.3 | 141.6±71.6 | 255±136.3 |
| Malignant | 153.9±80.8 | 179±83.8 | 333±126 |

**Table S12. Adipose tissue proportions across patient groups in adults**

| **Parameter** | **Values** | **VAT/TAT %** | **p-val.** | **VAT/SAT ratio** | **p-val.** |
| --- | --- | --- | --- | --- | --- |
| **Gender** | Female | 35.75±11.42 | <0.01 | 0.61±0.32 | <0.01 |
| Male | 55.34±10.21 | 1.35±0.54 |
| **Weight status** | Normal | 39.39±13.89 | 0.385 | 0.75±0.47 | 0.444 |
| Overweight | 45.84±15.78 | 1.02±0.65 |
| Obese | 40.40±12.75 | 0.75±0.4 |
| **Diagnosis type** | Normal | 41.63±13.08 | 0.829 | 0.79±0.42 | 0.891 |
| Benign | 41.35±14.59 | 0.83±0.55 |
| Malignant | 44.88±16.02 | 0.96±0.6 |

**Table S13. Correlations between adipose tissue quantifiers and BMI in adults**

| **Correlation** | **Pearson correlation coefficient** | **p-value** |
| --- | --- | --- |
| TAT surface & BMI | 0.792 | <0.01 |
| VAT/TAT% & BMI | - | 0.539 |
|  | **Spearmans Rho** |  |
| VAT surface & BMI | 0.623 | <0.01 |
| SAT surface & BMI | 0.782 | <0.01 |
| VAT/SAT ratio & BMI | - | 0.480 |

**S1 Figure 6. Visceral adipose tissue-BMI correlation**

**S1 Figure 7. Somatic adipose tissue-BMI correlation**

**S1 Figure 8. Total adipose tissue-BMI correlation**

**References**

1. Koliaki, C., Liatis, S. & Kokkinos, A. Obesity and cardiovascular disease: revisiting an old relationship. Metabolism 92, 98–107 (2019).

2. Negrea, M. O. et al. Causative Mechanisms of Childhood and Adolescent Obesity Leading to Adult Cardiometabolic Disease: A Literature Review. Applied Sciences 11, 11565 (2021).

3. Wajchenberg, B. L. Subcutaneous and Visceral Adipose Tissue: Their Relation to the Metabolic Syndrome. Endocr Rev 21, 697–738 (2000).

4. Fourman, L. T. et al. Comparison of visceral fat measurement by dual-energy X-ray absorptiometry to computed tomography in HIV and non-HIV. Nutr Diabetes 9, 6 (2019).

5. Zemel, B. S. Quantitative Computed Tomography and Computed Tomography in Children. Curr Osteoporos Rep 9, 284–290 (2011).

6. Huang, T. T.-K., Johnson, M. S., Figueroa-Colon, R., Dwyer, J. H. & Goran, M. I. Growth of Visceral Fat, Subcutaneous Abdominal Fat, and Total Body Fat in Children. Obesity 9, 283–289 (2001).

7. Klopfenstein, B. J. et al. Comparison of 3 T MRI and CT for the measurement of visceral and subcutaneous adipose tissue in humans. Br J Radiol 85, e826–e830 (2012).

8. Simoni, P., Guglielmi, R. & Gómez, M. P. A. Imaging of body composition in children. Quant Imaging Med Surg 10, 1661–1671 (2020).

9. Pescatori, L. C. et al. Quantification of visceral adipose tissue by computed tomography and magnetic resonance imaging: reproducibility and accuracy. Radiol Bras 52, 1–6 (2019).

10. Zaffina, C. et al. Body composition assessment: comparison of quantitative values between magnetic resonance imaging and computed tomography. Quant Imaging Med Surg 12, 1450–1466 (2022).

11. Shen, W. et al. Visceral adipose tissue: relations between single-slice areas and total volume. Am J Clin Nutr 80, 271–278 (2004).

12. Shen, W. et al. Total body skeletal muscle and adipose tissue volumes: estimation from a single abdominal cross-sectional image. J Appl Physiol 97, 2333–2338 (2004).

13. Shen, W., Liu, H., Punyanitya, M., Chen, J. & Heymsfield, S. B. Pediatric obesity phenotyping by magnetic resonance methods. Curr Opin Clin Nutr Metab Care 8, 595–601 (2005).

14. Shen, W. et al. A Single mri Slice Does Not Accurately Predict Visceral and Subcutaneous Adipose Tissue Changes During Weight Loss. Obesity 20, 2458–2463 (2012).

15. Uthaya, S., Bell, J. & Modi, N. Adipose Tissue Magnetic Resonance Imaging in the Newborn. Horm Res Paediatr 62, 143–148 (2004).

16. Samara, A., Ventura, E. E., Alfadda, A. A. & Goran, M. I. Use of MRI and CT for fat imaging in children and youth: what have we learned about obesity, fat distribution and metabolic disease risk? Obesity Reviews 13, 723–732 (2012).

17. Brown, R. E., Kuk, J. L. & Lee, S. Measurement site influences abdominal subcutaneous and visceral adipose tissue in obese adolescents before and after exercise. Pediatr Obes 10, 98–104 (2015).

18. Eloi, J. C. et al. Quantification of Abdominal Fat in Obese and Healthy Adolescents Using 3 Tesla Magnetic Resonance Imaging and Free Software for Image Analysis. PLoS One 12, e0167625 (2017).

19. Murata, H. et al. Comparison between DXA and MRI for the Visceral Fat Assessment in Athletes. Int J Sports Med 43, 625–631 (2022).

20. Hu, H. H., Nayak, K. S. & Goran, M. I. Assessment of abdominal adipose tissue and organ fat content by magnetic resonance imaging. Obesity Reviews 12, e504–e515 (2011).

21. Positano, V. et al. An accurate and robust method for unsupervised assessment of abdominal fat by MRI. Journal of Magnetic Resonance Imaging 20, 684–689 (2004).

22. Marunowski, K. et al. MRI-Derived Subcutaneous and Visceral Adipose Tissue Reference Values for Children Aged 6 to Under 18 Years. Front Nutr 8, (2021).

23. Poonawalla, A. H. et al. Adipose tissue MRI for quantitative measurement of central obesity. Journal of Magnetic Resonance Imaging 37, 707–716 (2013).

24. Linder, N. et al. Estimation of abdominal subcutaneous fat volume of obese adults from single-slice MRI data – Regression coefficients and agreement. Eur J Radiol 130, 109184 (2020).

25. Schaudinn, A. et al. Predictive accuracy of single- and multi-slice MRI for the estimation of total visceral adipose tissue in overweight to severely obese patients. NMR Biomed 28, 583–590 (2015).

26. Schwenzer, N. F. et al. Quantitative Analysis of Adipose Tissue in Single Transverse Slices for Estimation of Volumes of Relevant Fat Tissue Compartments. Invest Radiol 45, 788–794 (2010).

27. Springer, F. et al. Predicting volumes of metabolically important whole-body adipose tissue compartments in overweight and obese adolescents by different MRI approaches and anthropometry. Eur J Radiol 81, 1488–1494 (2012).

28. Storz, C. et al. The role of visceral and subcutaneous adipose tissue measurements and their ratio by magnetic resonance imaging in subjects with prediabetes, diabetes and healthy controls from a general population without cardiovascular disease. Br J Radiol 20170808 (2018) doi:10.1259/bjr.20170808.

29. Bonekamp, S. et al. Quantitative comparison and evaluation of software packages for assessment of abdominal adipose tissue distribution by magnetic resonance imaging. Int J Obes 32, 100–111 (2008).

30. Ross, R., Rissanen, J., Pedwell, H., Clifford, J. & Shragge, P. Influence of diet and exercise on skeletal muscle and visceral adipose tissue in men. J Appl Physiol 81, 2445–2455 (1996).

31. Thörmer, G. et al. Software for automated MRI-based quantification of abdominal fat and preliminary evaluation in morbidly obese patients. Journal of Magnetic Resonance Imaging 37, 1144–1150 (2013).

32. Gerber, A. J. & Peterson, B. S. What Is an Image? J Am Acad Child Adolesc Psychiatry 47, 245–248 (2008).

33. Bernecker, D. Image Processing. in Medical Imaging Systems: An Introductory Guide (eds. Maier A, Steidl S, Christlein V & et al.) 37–55 (Springer, Cham (CH), 2018). doi:10.1007/978-3-319-96520-8_3.

34. Dougherty, E. R. & Lotufo, R. A. Hands-on Morphological Image Processing. (SPIE, 2003). doi:10.1117/3.501104.

35. Lim, J. S. Two-Dimensional Signal and Image Processing. (Prentice Hall, Englewood Cliffs, NJ, 1990).

36. Gonzales, R. C. & Woods, R. E. Digital Image Processing. (Pearson, USA, 2018).

37. Ogawa, M. et al. Comparing intramuscular adipose tissue on T1-weighted and two-point Dixon images. PLoS One 15, e0231156 (2020).

38. Otsu, N. A Threshold Selection Method from Gray-Level Histograms. IEEE Trans Syst Man Cybern 9, 62–66 (1979).

39. Chaudry, O. et al. Magnetic Resonance Imaging and Bioelectrical Impedance Analysis to Assess Visceral and Abdominal Adipose Tissue. Obesity 28, 277–283 (2020).

40. Xing, J., Yang, P. & Qingge, L. Robust 2D Otsu’s Algorithm for Uneven Illumination Image Segmentation. Comput Intell Neurosci 2020, 5047976 (2020).

41. Thörmer, G. et al. Software for automated MRI-based quantification of abdominal fat and preliminary evaluation in morbidly obese patients. Journal of Magnetic Resonance Imaging 37, 1144–1150 (2013).

42. Würslin, C. et al. Topography mapping of whole body adipose tissue using A fully automated and standardized procedure. Journal of Magnetic Resonance Imaging 31, 430–439 (2010).

43. Choudhry, M. S. & Kapoor, R. Performance Analysis of Fuzzy C-Means Clustering Methods for MRI Image Segmentation. Procedia Comput Sci 89, 749–758 (2016).

44. Makrogiannis, S. et al. Automated quantification of muscle and fat in the thigh from water-, fat-, and nonsuppressed MR images. Journal of Magnetic Resonance Imaging 35, 1152–1161 (2012).

45. Maddalo, M. et al. Validation of a free software for unsupervised assessment of abdominal fat in MRI. Physica Medica 37, 24–31 (2017).

46. Langner, T. et al. Fully convolutional networks for automated segmentation of abdominal adipose tissue depots in multicenter water–fat MRI. Magn Reson Med 81, 2736–2745 (2019).

47. Shen, W. et al. Visceral adipose tissue: relationships between single slice areas at different locations and obesity-related health risks. Int J Obes 31, 763–769 (2007).

48. O’Connor, M., Ryan, J. & Foley, S. Best single-slice location to measure visceral adipose tissue on paediatric CT scans and the relationship between anthropometric measurements, gender and VAT volume in children. Br J Radiol 88, 20140711 (2015).

49. Lee, S., Kuk, J. L., Kim, Y. & Arslanian, S. A. Measurement site of visceral adipose tissue and prediction of metabolic syndrome in youth. Pediatr Diabetes 12, 250–257 (2011).

50. Kuk, J. L., Church, T. S., Blair, S. N. & Ross, R. Measurement Site and the Association Between Visceral and Abdominal Subcutaneous Adipose Tissue With Metabolic Risk in Women. Obesity 18, 1336–1340 (2010).

51. Kuk, J. L., Church, T. S., Blair, S. N. & Ross, R. Does Measurement Site for Visceral and Abdominal Subcutaneous Adipose Tissue Alter Associations With the Metabolic Syndrome? Diabetes Care 29, 679–684 (2006).

52. Earls, J. P. & Krinsky, G. A. Abdominal and pelvic applications of opposed-phase MR imaging. American Journal of Roentgenology 169, 1071–1077 (1997).

53. Outwater, E. K., Blasbalg, R., Siegelman, E. S. & Vala, M. Detection of lipid in abdominal tissues with opposed-phase gradient-echo images at 1.5 T: techniques and diagnostic importance. RadioGraphics 18, 1465–1480 (1998).

54. Bennett, M. & Dyer, R. B. Classic signs in abdominal radiology “India ink” artifact. Abdominal Radiology 42, 1281–1282 (2017).

55. Chalasani, N. et al. The Diagnosis and Management of Non-alcoholic Fatty Liver Disease: Practice Guideline by the American Gastroenterological Association, American Association for the Study of Liver Diseases, and American College of Gastroenterology. Gastroenterology 142, 1592–1609 (2012).

56. Lemieux, I. & Després, J.-P. Metabolic Syndrome: Past, Present and Future. Nutrients 12, 3501 (2020).

57. Dietrich, P. & Hellerbrand, C. Non-alcoholic fatty liver disease, obesity and the metabolic syndrome. Best Pract Res Clin Gastroenterol 28, 637–653 (2014).

58. Shen, W. et al. Sexual dimorphism of adipose tissue distribution across the lifespan: a cross-sectional whole-body magnetic resonance imaging study. Nutr Metab (Lond) 6, 17 (2009).

59. Kuk, J. L., Lee, S., Heymsfield, S. B. & Ross, R. Waist circumference and abdominal adipose tissue distribution: influence of age and sex. Am J Clin Nutr 81, 1330–1334 (2005).

60. Han, J. et al. Abdominal fat and muscle distributions in different stages of colorectal cancer. BMC Cancer 23, 279 (2023).

61. Anderson, L. J. et al. Whole‐body and adipose tissue metabolic phenotype in cancer patients. J Cachexia Sarcopenia Muscle 13, 1124–1133 (2022).

62. Müller, M. J., Braun, W., Enderle, J. & Bosy-Westphal, A. Beyond BMI: Conceptual Issues Related to Overweight and Obese Patients. Obes Facts 9, 193–205 (2016).

63. Palmer, B. F. & Clegg, D. J. The sexual dimorphism of obesity. Mol Cell Endocrinol 402, 113–119 (2015).

64. World Health Organization. Obesity and overweight. https://www.who.int/news-room/fact-sheets/detail/obesity-and-overweight (accessed 6 June 2025).

65. World Health Organization. BMI-for-age (5–19 years). https://www.who.int/tools/growth-reference-data-for-5to19-years/indicators/bmi-for-age (accessed 6 June 2025).

66. World Health Organization. Noncommunicable diseases: childhood overweight and obesity. https://www.who.int/news-room/questions-and-answers/item/noncommunicable-diseases-childhood-overweight-and-obesity (accessed 6 June 2025)

67. Centers for Disease Control and Prevention. About adult BMI. https://www.cdc.gov/bmi/adult-calculator/bmi-categories.html (accessed 6 June 2025).

68. Bouazizi, K. et al. Abdominal adipose tissue components quantification in MRI as a relevant biomarker of metabolic profile. Magn Reson Imaging 80, 14–20 (2021).

69. Cervantes, A., Singh, R. G., Kim, J. U., DeSouza, S. V. & Petrov, M. S. Relationship of Anthropometric Indices to Abdominal Body Composition: A Multi-Ethnic New Zealand Magnetic Resonance Imaging Study. J Clin Med Res 11, 435–446 (2019).

70. Strzelecki, M., Piórkowski, A. & Obuchowicz, R. Effect of Matrix Size Reduction on Textural Information in Clinical Magnetic Resonance Imaging. J Clin Med 11, 2526 (2022).

71. Mezrich, R. A perspective on K-space. Radiology 195, 297–315 (1995).

72. Storz, C. et al. The role of visceral and subcutaneous adipose tissue measurements and their ratio by magnetic resonance imaging in subjects with prediabetes, diabetes and healthy controls from a general population without cardiovascular disease. Br J Radiol 20170808 (2018) doi:10.1259/bjr.20170808.

73. Müller, D., Soto-Rey, I. & Kramer, F. Towards a guideline for evaluation metrics in medical image segmentation. BMC Res Notes 15, 210 (2022).
